# Supplementary material for: Informing the Development of a Mobile Phone HIV Testing Intervention: Intentions to Use Specific HIV Testing Approaches Among Young Black Transgender Women and Men Who Have Sex With Men
Source: PubMed Central journal article supplement (PMC5522583; doi:10.2196/publichealth.7397), 2017-07-07
Supplement: publichealth_v3i3e45_app1.pdf [file publichealth_v3i3e45_app1.pdf]

Recruitment Sites included: BGC Live, Craig's List, Facebook, Mused Magazine, Scruff, Grindr, local Community organization websites

fear? secrets? bottom? verse?  
Sex? top? relationships? disclosure?  
**ALLABOUTME**  
A STUDY ABOUT HIV TESTING  
**TELL US ABOUT YOURSELF**  
love? STDs? community risky?  
communication? trust? hookups? Testing?

**ALLABOUTME**  
A STUDY ABOUT HIV TESTING

Young Black men and Transwomen in the U.S. are affected by HIV at severely disproportionate rates. A significant proportion of this population have not tested in the prior year and are much more likely to be unaware of their HIV infection compared to other young men.

All About Me is a research study designed to address low HIV testing rates among this group.

If you are interested in telling us what you think about the health needs, HIV testing, and prevention in your community take our online survey!

**YOU WILL RECEIVE \$10 FOR AMAZON.COM FOR PARTICIPATING!**

Please use this link to share your thoughts:  
<http://sgiz.mobi/s3/dc81f9888de5>

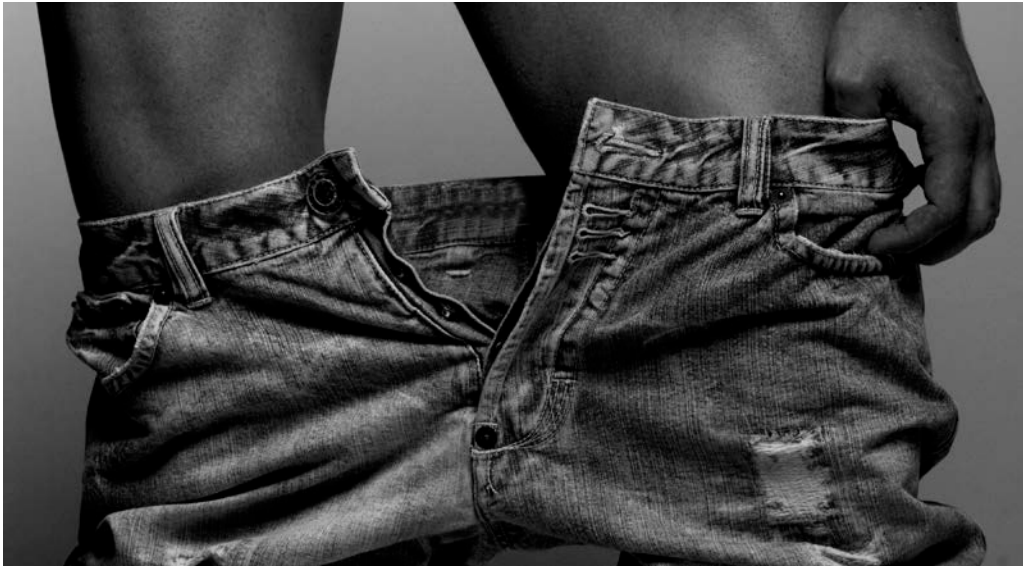

<http://sgiz.mobi/s3/479a88ed9cdf> Help us learn more about HIV testing in the Black community.
